# Supplementary material
Source: publisher figshare collection journal article supplement (https://acs.figshare.com/ndownloader/files/5185138)
Supplement: Supplementary file 1 [file 5185138]

## Supporting Information

**Title:** Diverse Modes of Reactivity of Dialkyl azodicarboxylates with P(III) Compounds: Synthesis, Structure and Reactivity of Products Other than the Morrison-Brunn-Huisgen Intermediate in a Mitsunobu-Type Reaction

**Authors:** N. Satish Kumar, K. Praveen Kumar, K. V. P. Pavan Kumar, Praveen Kommana, Jagadese J. Vittal and K. C. Kumara Swamy\*

|                                       |                                                                                        |         |
|---------------------------------------|----------------------------------------------------------------------------------------|---------|
| <b>Figure S1.</b>                     | A plot showing the hydrogen-bonded dimer of <b>16</b> .                                | S2      |
| <b>Figure S2.</b>                     | A plot showing the molecular structure of <b>19</b> .                                  | S3      |
| <b>Figure S3</b>                      | A plot showing the molecular structure of compound <b>21</b> .                         | S4      |
| <b>Figure S4.</b>                     | A plot showing the molecular structure of <b>22</b> .CH <sub>2</sub> Cl <sub>2</sub> . | S5      |
| <b>Figure S5</b>                      | A plot showing the molecular structure of compound <b>25</b> .                         | S6      |
| <b>Figure S6</b>                      | A plot showing the molecular structure of compound <b>27</b> .                         | S7      |
| <b>Figure S7.</b>                     | A plot showing the molecular structure of <b>28</b> .                                  | S8      |
| <b>Figure S8</b>                      | A plot showing the molecular structure of compound <b>30</b> .                         | S9      |
| <b>Figure S9</b>                      | Solution (VT) and solid-state <sup>31</sup> P NMR spectra of <b>17</b> .               | S10     |
| <b>Figure S10</b>                     | Variable temperature <sup>31</sup> P NMR spectra for compound <b>28</b> .              | S11     |
| <b>Experimental (General remarks)</b> |                                                                                        | S12     |
| <b>Table S1.</b>                      | <sup>31</sup> P NMR chemical shifts for compounds mentioned in the text                | S13-S17 |

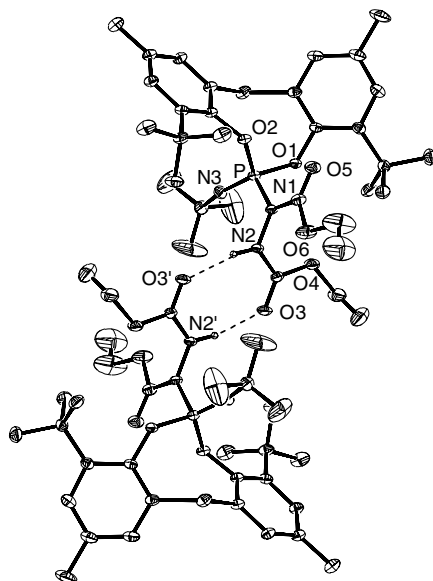

**Figure S1.** A plot showing the molecular structure of the hydrogen-bonded dimer of **16**; only selected atoms labeled with the hydrogen atoms not shown. The second set in the asymmetric unit is not shown. Selected bond parameters: P-O(1) 1.586(3), P-O(2) 1.593(3), P-N(1) 1.718(4), P-N(3) 1.464(4) Å. P...S 3.237 (2) Å. Hydrogen bonded D-H, H...A, D...A and D-H...A parameters: N(2)-H(N2)...O(3') [dimer] 0.84(4), 2.01(4), 2.833(5)Å, 166(4)°.

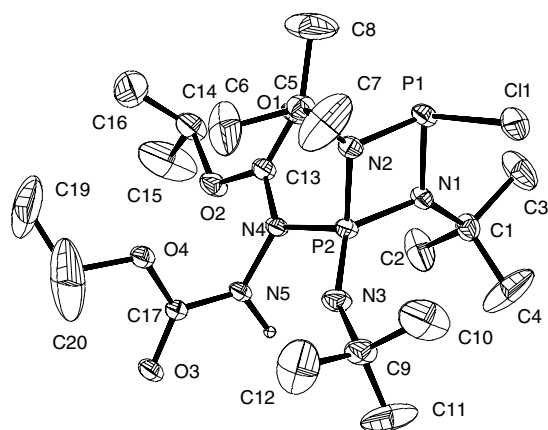

**Figure S2.** A plot showing the molecular structure of **19**; only selected atoms labeled with the hydrogen atoms [except on N(5)] not shown. The second molecule in the asymmetric unit is not shown. Selected bond parameters: P(1)-N(1) 1.680(3), P(1)-N(2) 1.695(3), P(1)-Cl(1) 2.1425(16), P(2)-N(1) 1.681(3), P(2)-N(2) 1.674(3), P(2)-N(3) 1.488(3), P(2)-N(4) 1.723(3) Å. Hydrogen bonded D-H, H...A, D...A and D-H...A parameters: N(5)-H(N5)...O(3') [dimer] 0.93(4), 1.96(4), 2.892(4)Å, 175(3)°.

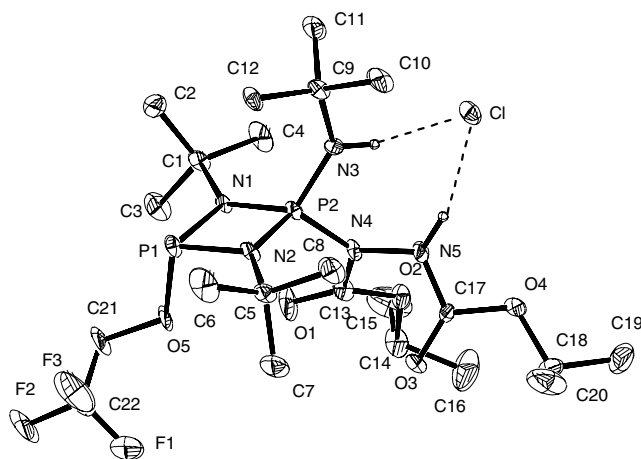

**Figure S3** A plot showing the molecular structure of compound **21**. Selected bond parameters: P(1)-N(1) 1.707(7), P(1)-N(2) 1.701(7), P(1) – O(5) 1.605(7), P(2)-N(3) 1.585(7), P(2)-N(1) 1.619(6), P(2)-N(2) 1.630 (7), P(2)-N(4) 1.683(8), N(4)-N(5) 1.436(8), P(1)...P(2) 2.496(3) Å. D-H, H...A, D...A and D-H...A parameters: N(3)-H(3)...Cl 0.86, 2.37, 3.207(8)Å, 163.4°; N(5)-H(5)...Cl 0.86, 2.34, 3.071(9), 142.4°.

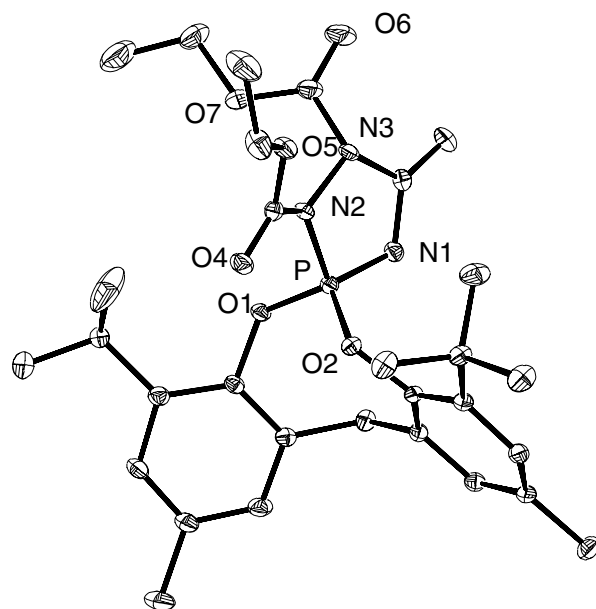

**Figure S4.** A plot showing the molecular structure of **22**·CH<sub>2</sub>Cl<sub>2</sub>; only selected atoms labeled with the solvent and hydrogen atoms not shown. Selected bond parameters: P-O(1) 1.556(3), P-O(2) 1.547(3), P-N(1) 1.564(4), P- N(2) 1.656(3) Å.

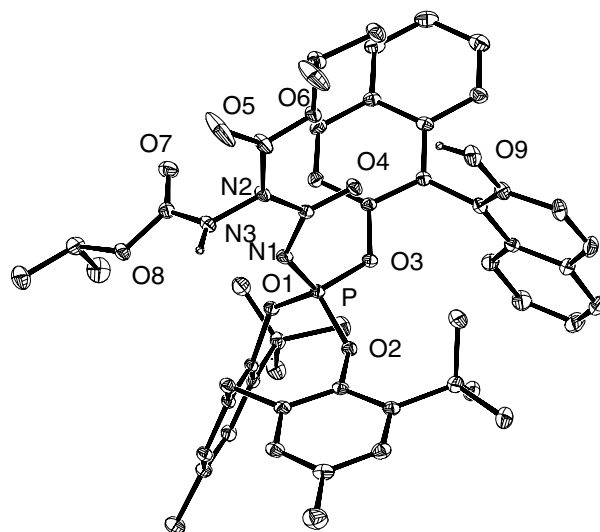

**Figure S5** A plot showing the molecular structure of compound **25.3/2C<sub>6</sub>H<sub>5</sub>CH<sub>3</sub>**; only selected atoms labeled with the solvent and hydrogen atoms not shown. Selected bond parameters: P-O(1) 1.565(2), P-O(2) 1.545(2), P-O(3) 1.553(3), P-N(1) 1.546(3) Å. D-H, H...A, D...A and D-H...A parameters: N(3)-H(3)...O(8') [dimeric] 0.87, 2.24, 3.062(4) Å, 156.8°; O(9)-H(9)...O(9') [intramolecular] 0.83, 2.31, 2.778(4) Å, 116.1°.

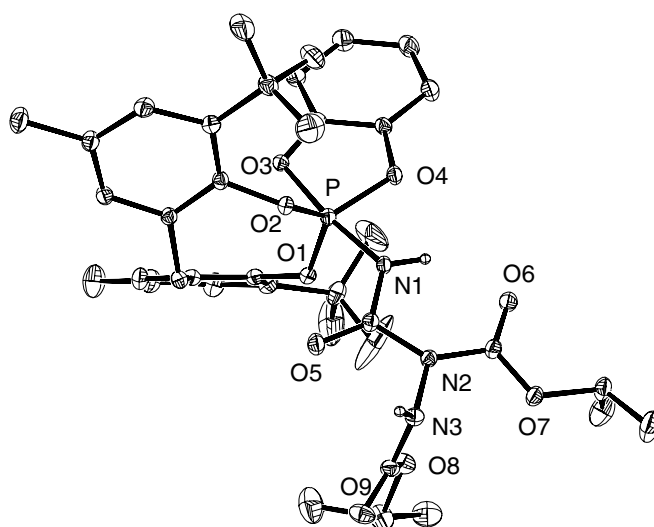

**Figure S6** A plot showing the molecular structure of compound **27.3/2C<sub>6</sub>H<sub>5</sub>CH<sub>3</sub>**; only selected atoms labeled with the solvent and hydrogen atoms not shown. Selected bond parameters: P-O(1) 1.596(2), P-O(2) 1.587(3), P-O(3) 1.717(2), P-O(4) 1.648(2), P-N(1) 1.738(3) Å, O(3)-P-N(1) 173.16(16)°. D-H, H...A, D...A and D-H...A parameters: N(1)-H(N1)...O(6) [intramolecular] 0.86(3), 1.87(3), 2.613(4)Å, 144(3)°; N(3)-H(N3)...O(9') [dimeric] 0.99(4), 1.99(4), 2.955(5), 166(4)°.

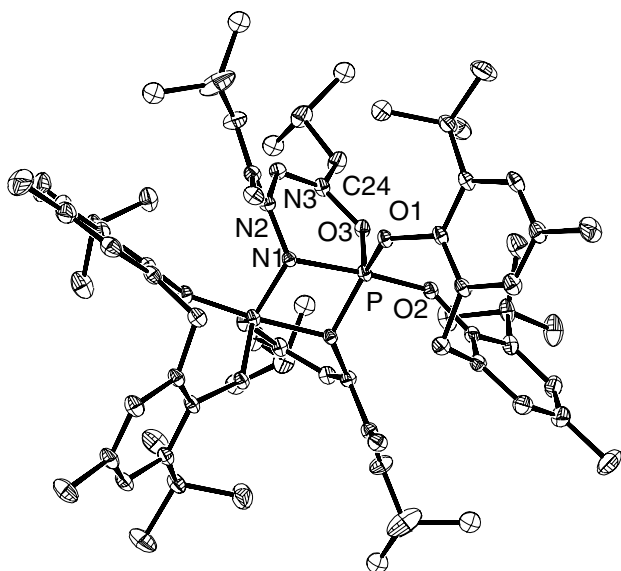

**Figure S7.** A plot showing the molecular structure of **28**; the asymmetric unit contains only one half of the molecule. The disorder at isopropyl methyl carbons not shown; only selected atoms labeled with the hydrogen atoms not shown. Selected bond parameters: P-O(1) 1.603(3), P-O(2) 1.624(3), P-O(3) 1.622(3), P-N(1) 1.790(3), P-N(1') 1.682(3) Å, O(2)-P-N(1) 174.82(14)°.



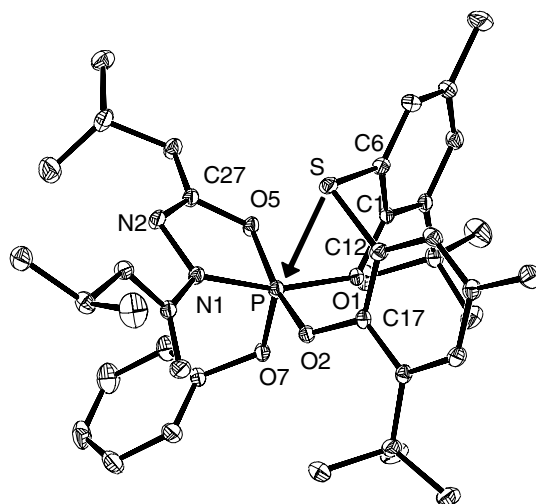

**Figure S8** A plot showing the molecular structure of compound **30**; only selected atoms labeled with the solvent and hydrogen atoms not shown. Selected bond parameters: P-O(1) 1.6605(15), P-O(2) 1.6331(17), P-O(5) 1.6894(17), P-O(7) 1.5949(18), P-N(1) 1.7479(19), S→P 2.7942(10) Å, O(1)-P-N(1) 160.76(10), O(2)-P-O(5) 164.67(9), O(7)-P-S 168.66(7)°.

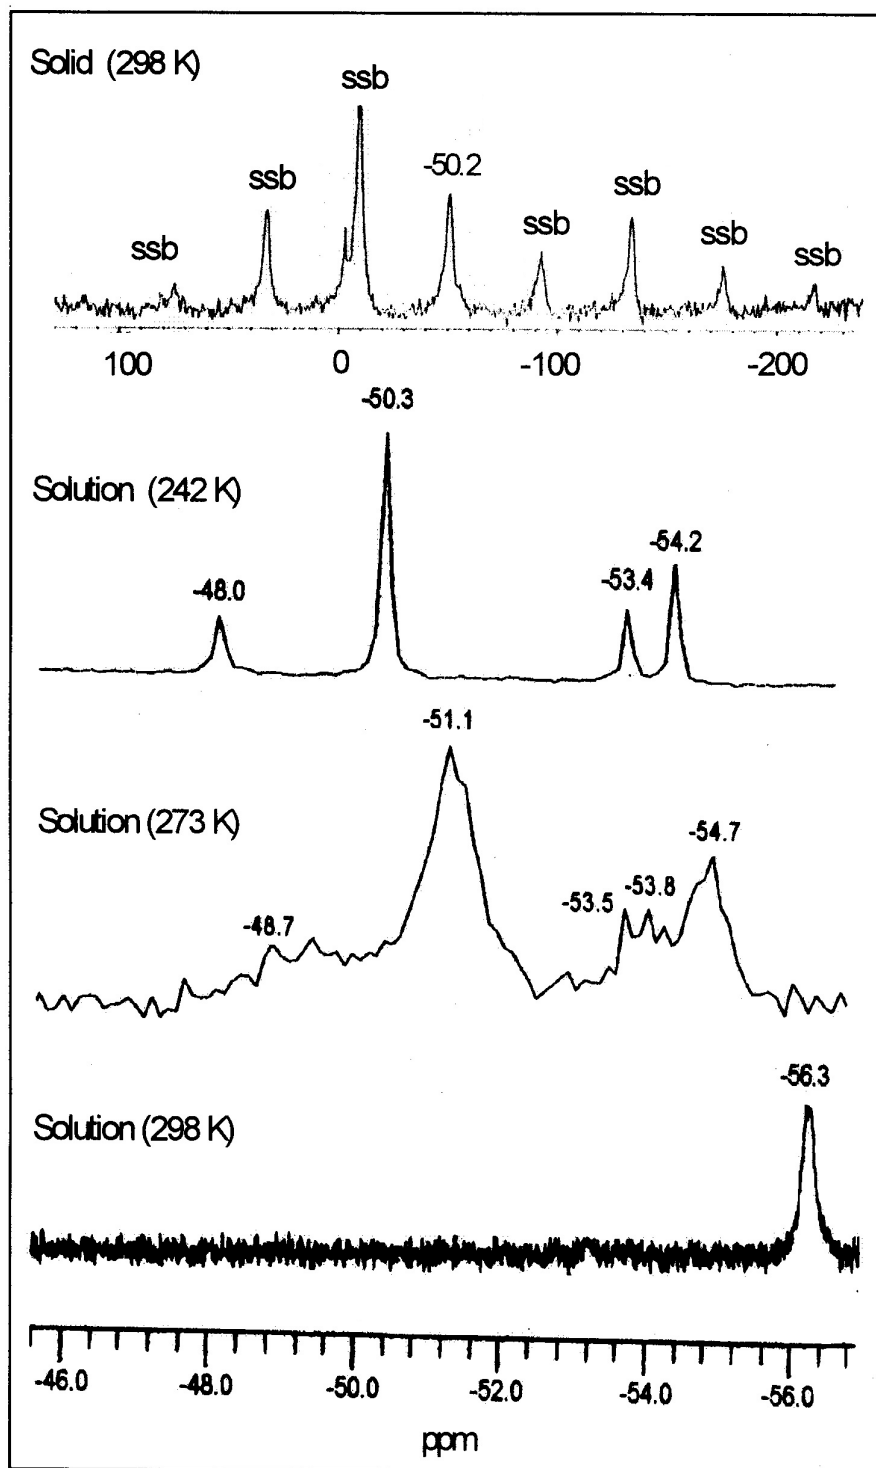

**Figure S9** Solution (VT) and solid-state (spinning at 5 kHz)  $^{31}\text{P}$  NMR spectra of  $\text{CH}_2(6\text{-}t\text{-Bu-4-Me-C}_6\text{H}_2\text{O})_2\text{P(N-}t\text{-Bu)\{N(CO}_2\text{Et)NH(CO}_2\text{OEt)\}}$  (**17**). The spinning side bands were determined by recording the spectrum using a spinning rate of 7 kHz.

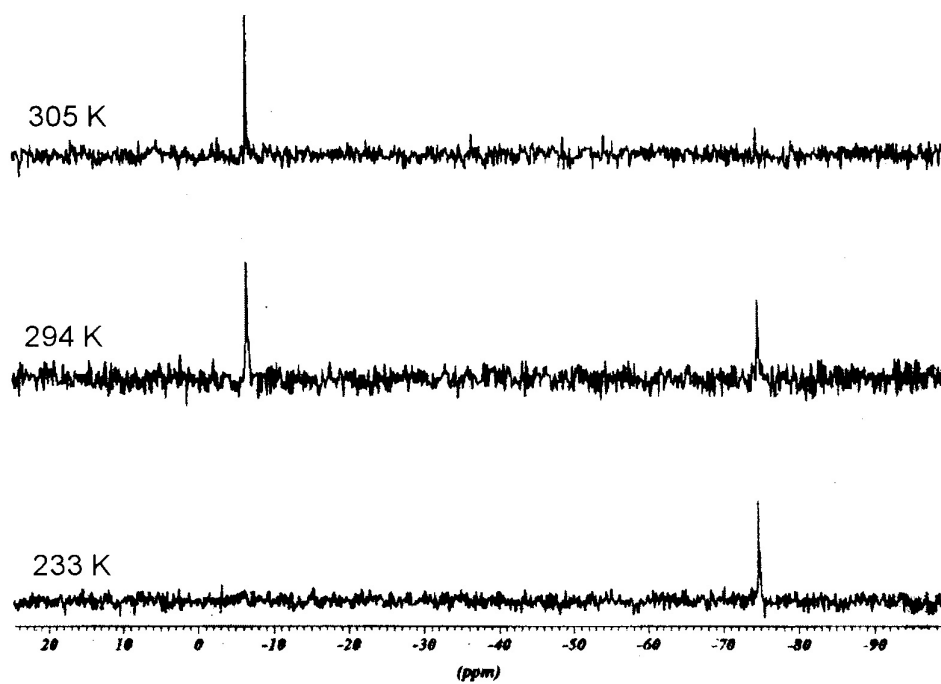

**Figure S10** Variable temperature  $^{31}\text{P}$  NMR spectra for compound **28**.

### Experimental (General Remarks):

Chemicals and solvents used in this study were purified according to standard procedures.<sup>24</sup> All reactions, unless stated otherwise, were performed in a dry nitrogen atmosphere. <sup>1</sup>H, <sup>13</sup>C and <sup>31</sup>P{H} NMR spectra were recorded using a 200 MHz spectrometer in CDCl<sub>3</sub> or C<sub>6</sub>D<sub>5</sub>CD<sub>3</sub> solutions (unless stated otherwise), with shifts referenced to SiMe<sub>4</sub> (δ = 0) or 85 % H<sub>3</sub>PO<sub>4</sub> (δ = 0). Variable temperature <sup>1</sup>H and <sup>31</sup>P NMR spectra were recorded in C<sub>6</sub>D<sub>5</sub>CD<sub>3</sub>.

*X-ray Crystallography:* Single crystal X-ray data were collected on an Enraf-Nonius MACH3 (compounds **16**, **19**, **21**, **22**) or on a Bruker AXS-SMART (**25**, **27**, **28**, **30**) diffractometer, using Mo-K<sub>α</sub> (λ = 0.71073 Å) radiation. The structures were solved by direct methods and refined by full-matrix least squares method using SHELX-97.<sup>25</sup> Structure solution and refinement: Absorption corrections were performed using SADABS program (Sheldrick 96), where applicable. The quality of data for **21** was only good enough to know the structure. In many cases, the terminal ethyl/ isopropyl/ *t*-butyl groups showed disorder as shown by higher thermal ellipsoids. For this reason a few disordered carbon atoms were refined isotropically in **28**; no significant residuals were found in this compound to account for any solvent.

(24) Perrin, D. D.; Armarego, W. L. F.; Perrin, D. R. *Purification of Laboratory Chemicals*, Pergamon, Oxford, UK, 1986.

(25) Sheldrick, G. M., *SHELX-97, A package for structure solution and refinement*, University of Göttingen, Göttingen, Germany, 1997.

**Table S1**  $^{31}\text{P}$  NMR chemical shifts of the compounds mentioned in the text

| Compound No. | Structure | $\delta(\text{P})$ (ppm) |
|--------------|-----------|--------------------------|
| 3            |           | -61.0, -69.7<br>(1:1)    |
| 4            |           | -67.3                    |
| 5            |           | -61.0, -61.7<br>(1:3)    |
| 6            |           | -51.7                    |

Contd..

| Compound No | Structure                                                                           | $\delta(P)$ ppm |
|-------------|-------------------------------------------------------------------------------------|-----------------|
| 8           | 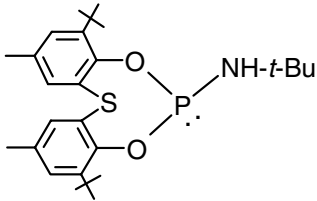   | 138.2           |
| 9           |    | 141.9           |
| 10          |    | 121.2           |
| 11          |   | 136.5           |
| 12          |  | 129.0           |
| 13          |  | 136.1           |
| 14          |  | 135.4, 200.3    |
| 15          |  | 89.4            |

Contd...

| Compound No | Structure                                                                            | $\delta(\text{P})$ ppm       |
|-------------|--------------------------------------------------------------------------------------|------------------------------|
| 16          | 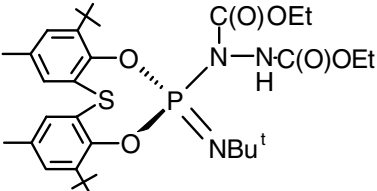   | -56.2 (br).                  |
| 17          |    | -56.3 (br)                   |
| 18          |    | -57.6 (br)                   |
| 19          |   | -38.0, 11.8,<br>133.6, 140.1 |
| 20          |  | -28.9, 68.9                  |
| 21          |  | 11.7, 114.4                  |
| 22          |  | 26.6                         |

Contd..

|    |  |       |
|----|--|-------|
| 23 |  | 27.0  |
| 24 |  | -7.4  |
| 25 |  | -7.6  |
| 26 |  | -59.2 |
| 27 |  | -59.3 |

Contd...



|    |                                                                                     |                              |
|----|-------------------------------------------------------------------------------------|------------------------------|
| 28 | 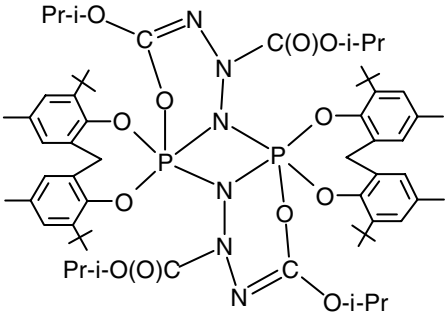  | 15.8 (~ 95%),<br>-6.7 (~ 5%) |
| 29 |   | -59.6, -66.7<br>(1:5)        |
| 30 |  | -67.0                        |
